# Supplementary material for: Highly efficient gene knockout in mice and zebrafish with RNA-guided endonucleases
Source: HighWire-hosted journal article supplement (doi:10.1101/gr.163394.113), 2013-11-19
Supplement: Supplemental_Material.docx [file Supplemental_Material.docx]

**Supplemental Material**

**Highly efficient gene knockout in mice and zebrafish with RNA-guided endonucleases**

Young Hoon Sung1,5, Jong Min Kim2,5, Hyun-Taek Kim3,5, Jaehoon Lee1, Jisun Jeon1, Young Jin1, Jung-Hwa Choi3, Young Ho Ban1, Sang-Jun Ha1, Cheol-Hee Kim3, Han-Woong Lee1,4*, and Jin-Soo Kim2*

1Department of Biochemistry, College of Life Science and Biotechnology, Yonsei University, Seoul 120-749
2National Creative Research Initiatives Center for Genome Engineering and Department of Chemistry, Seoul National University, Seoul 151-747
3Department of Biology, Chungnam National University, Daejeon 305-764
4Yonsei Laboratory Animal Research Center, Yonsei University, Seoul 120-749, Republic of Korea.
5These authors contributed equally to this work.

*Corresponding Authors: J.S.K ([jskim01@snu.ac.kr](mailto:jskim01@snu.ac.kr)) and H.W.L ([hwl@yonsei.ac.kr](mailto:hwl@yonsei.ac.kr))

**Table of Contents**

Supplemental Figure 1. Generation of sgRNAs against exon 2 of the mouse *Foxn1* gene.

Supplemental Figure 2. *Foxn1* gene knockout in mouse embryos by intra-cytoplasmic injection of *Cas9* mRNA and *Foxn1*-sgRNA.

Supplemental Figure 3. RGEN-induced *Foxn1* gene knockout in mice.

Supplemental Figure 4. *Foxn1* gene disruption in mouse embryos using the recombinant Cas9 protein: *Foxn1*-sgRNA complex.

Supplemental Figure 5. Toxicities of Cas9 protein complexed with *mitfa*-specific sgRNA in zebrafish embryos.

Supplemental Figure 6. Targeted indel mutations induced by Cas9 protein complex at *mitfa* and GFP reporter gene.

Supplemental Figure 7. Induction of somatic *mitfa* mutations by the Cas9 protein complex.

Supplemental Figure 8. Analysis of off-target activity of *Foxn1*-RGEN.

Supplemental Figure 9. Defective immune cell populations in PBMC from a bi-allelic *Prkdc* mutant founder #47.

Supplemental Figure 10. Germ-line transmission of the mutant alleles found in *Foxn1* mutant founder #108.

Supplemental Table 1. Genotypes of *Foxn1* mutant mice.

Supplemental Table 2. Genotypes of *Prkdc* mutant mice.

Supplemental Table 3. DNA sequences of *Foxn1* mutant alleles identified from a subset of T7E1-positive mutant founders.

Supplemental Table 4. DNA sequences of *Prkdc* mutant alleles.

Supplemental Table 5. Oligonucletide for preparation of *in vitro* RNA transcription template.

Supplemental Table 6. Primer sequences used in T7E1 assay and fPCR analysis.

Supplemental Table 7. Primers used for amplification of off-target sites.

**A**


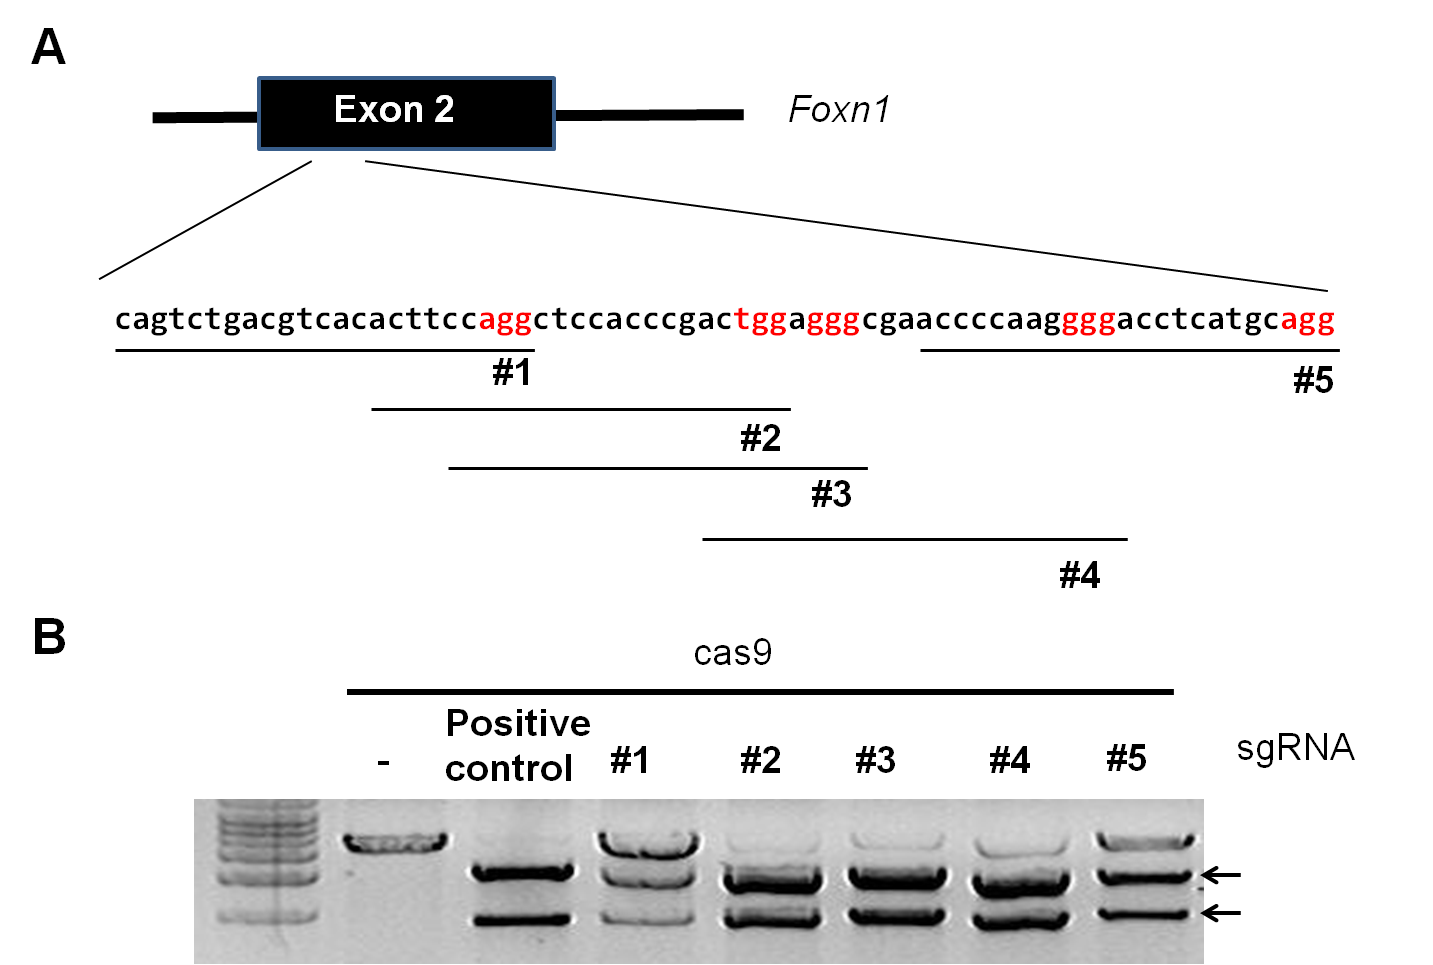


**B**


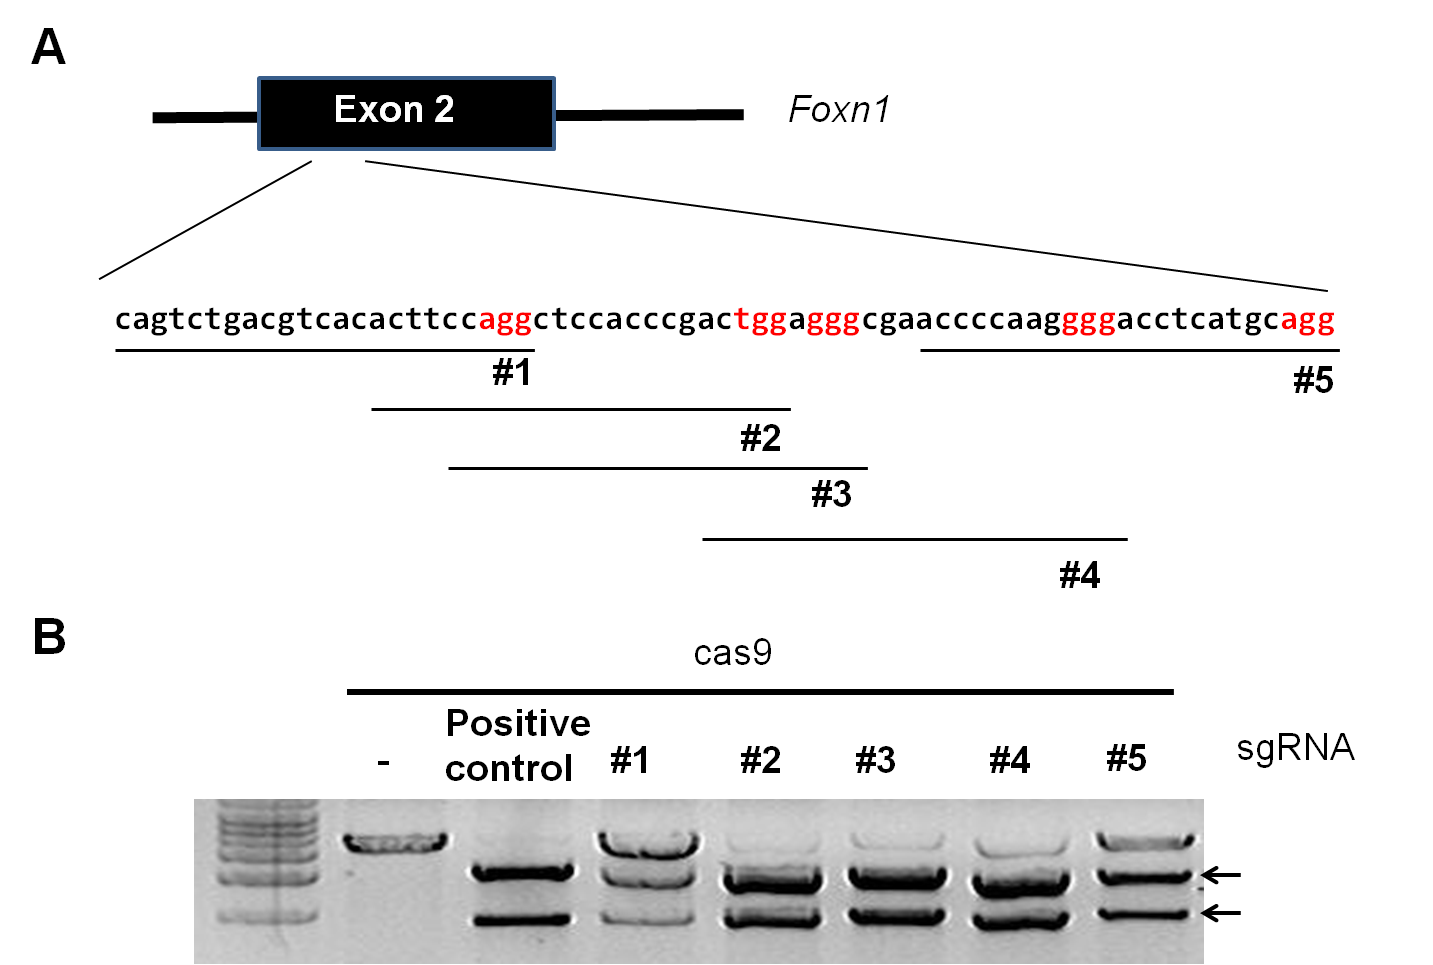


Supplemental Figure 1. Generation of sgRNAs targeted to exon 2 of the mouse *Foxn1* gene. (*A*) RGEN target sites in the mouse *Foxn1* gene. PAMs are shown in red letters, and targets are denoted by black lines. (*B*) *In vitro* cleavage assays evaluating *Foxn1*-sgRNAs complexed with recombinant Cas9 protein against a linearized plasmid containing target sequences as a substrate. Arrows indicate bands cleaved by RGEN.

**A**


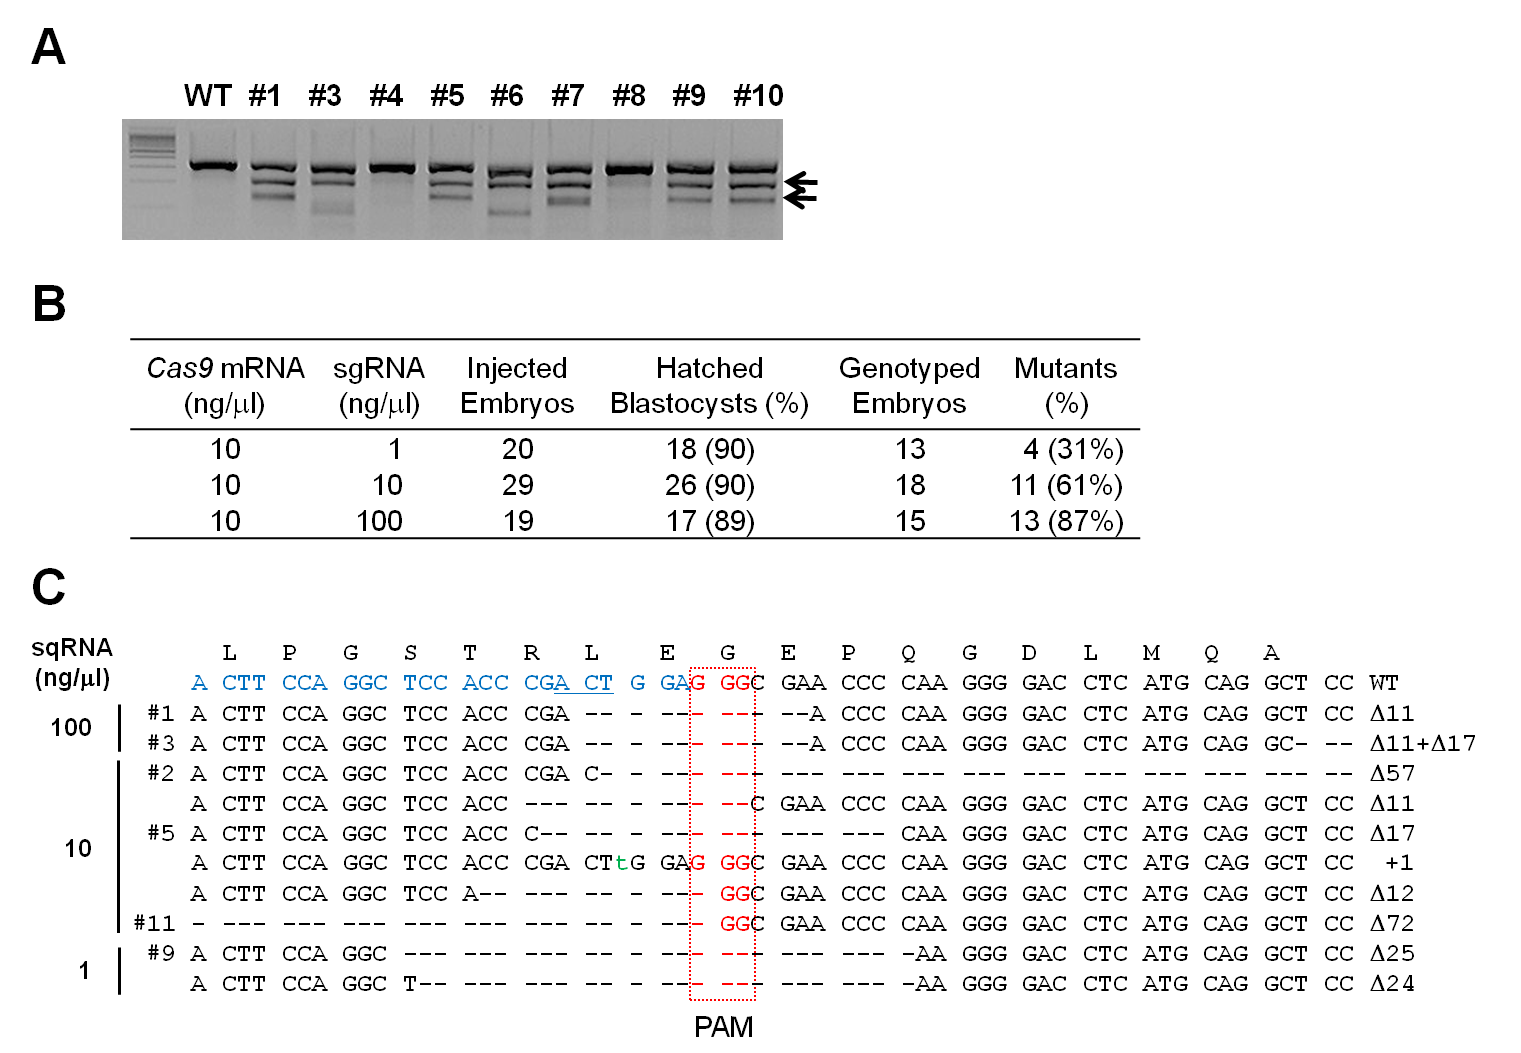


**B**


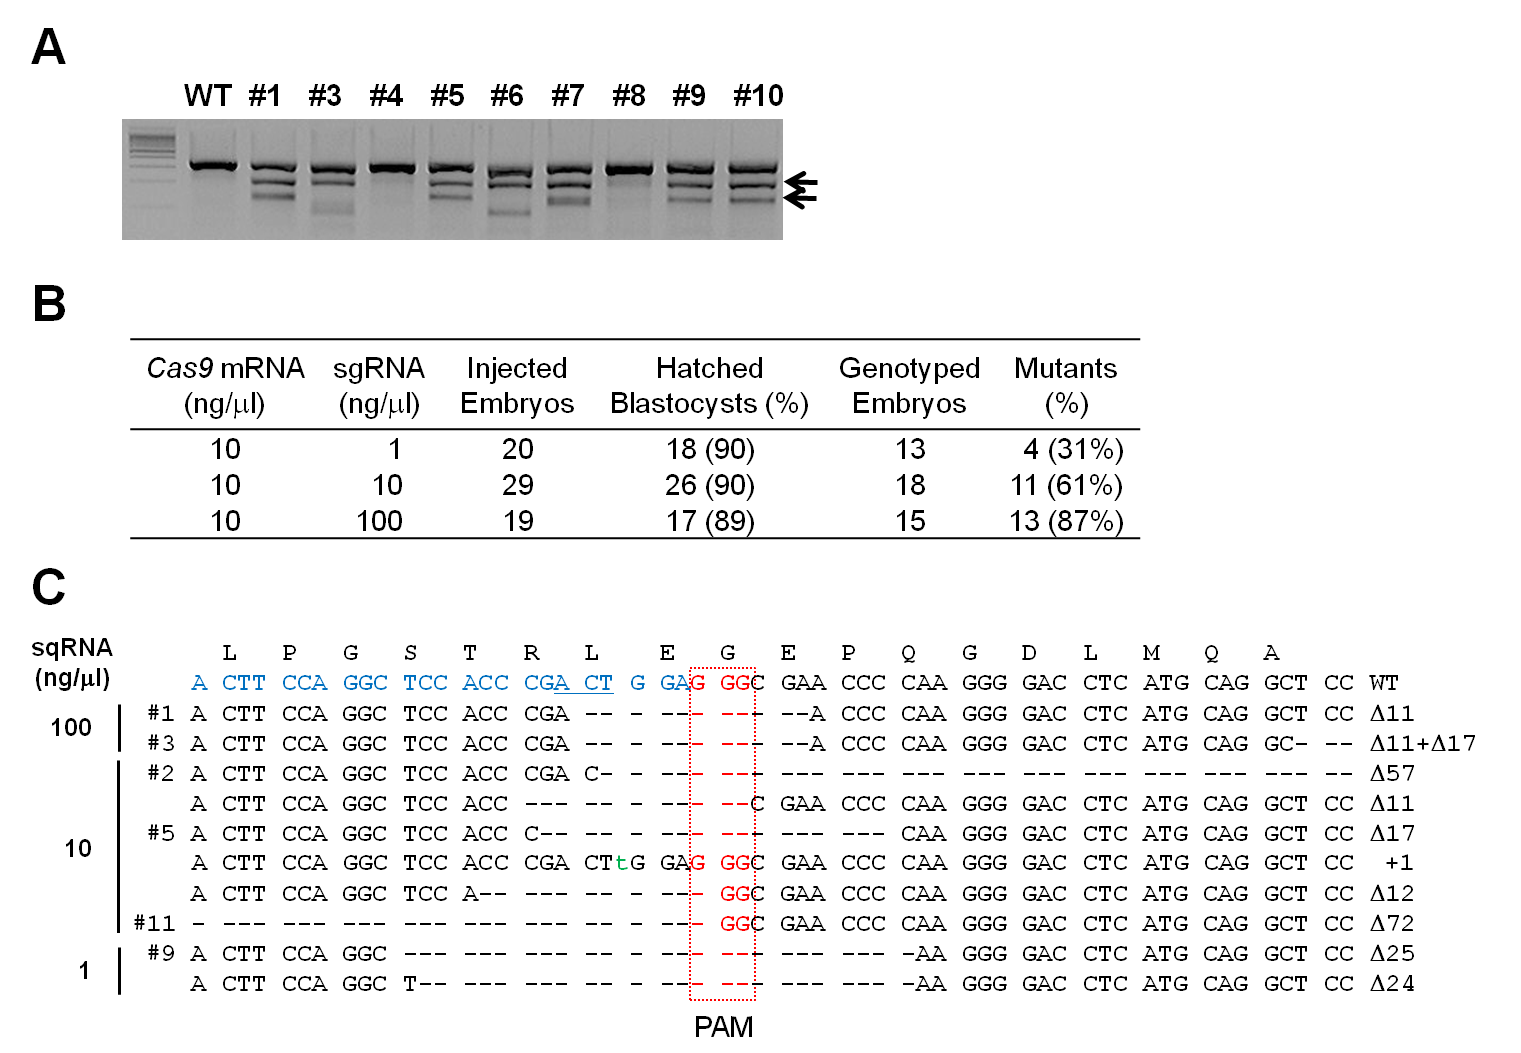


**C**


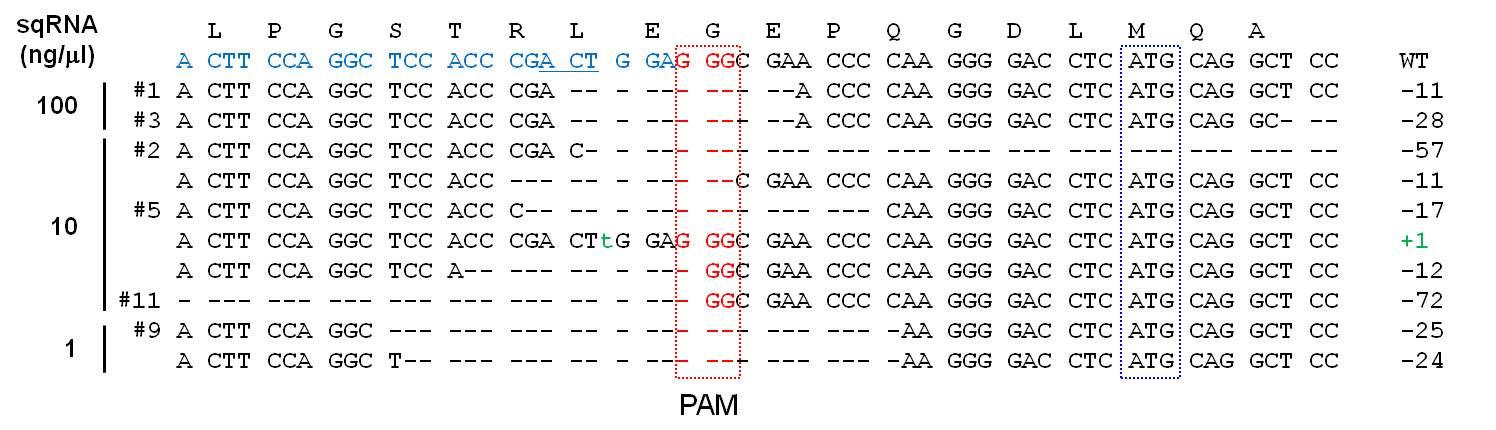


Supplemental Figure 2. *Foxn1* gene knockout in mouse embryos by intra-cytoplasmic injection of *Cas9* mRNA and *Foxn1*-sgRNA. (*A*) A representative result of a T7E1 assay monitoring the mutation rate after injecting the highest dose. Arrows indicate bands cleaved by T7E1. (*B*) A summary of T7E1 assay results. Mutant fractions among *in vitro* cultivated embryos obtained after intra-cytoplasmic injection of the indicated RGEN doses are indicated. The percentages were calculated using the number in the column to its left as the denominator. (*C*) DNA sequences of *Foxn1* mutant alleles identified from a subset of T7E1-positive mutant embryos. The target sequence of the wild-type allele is denoted in blue.

**A**
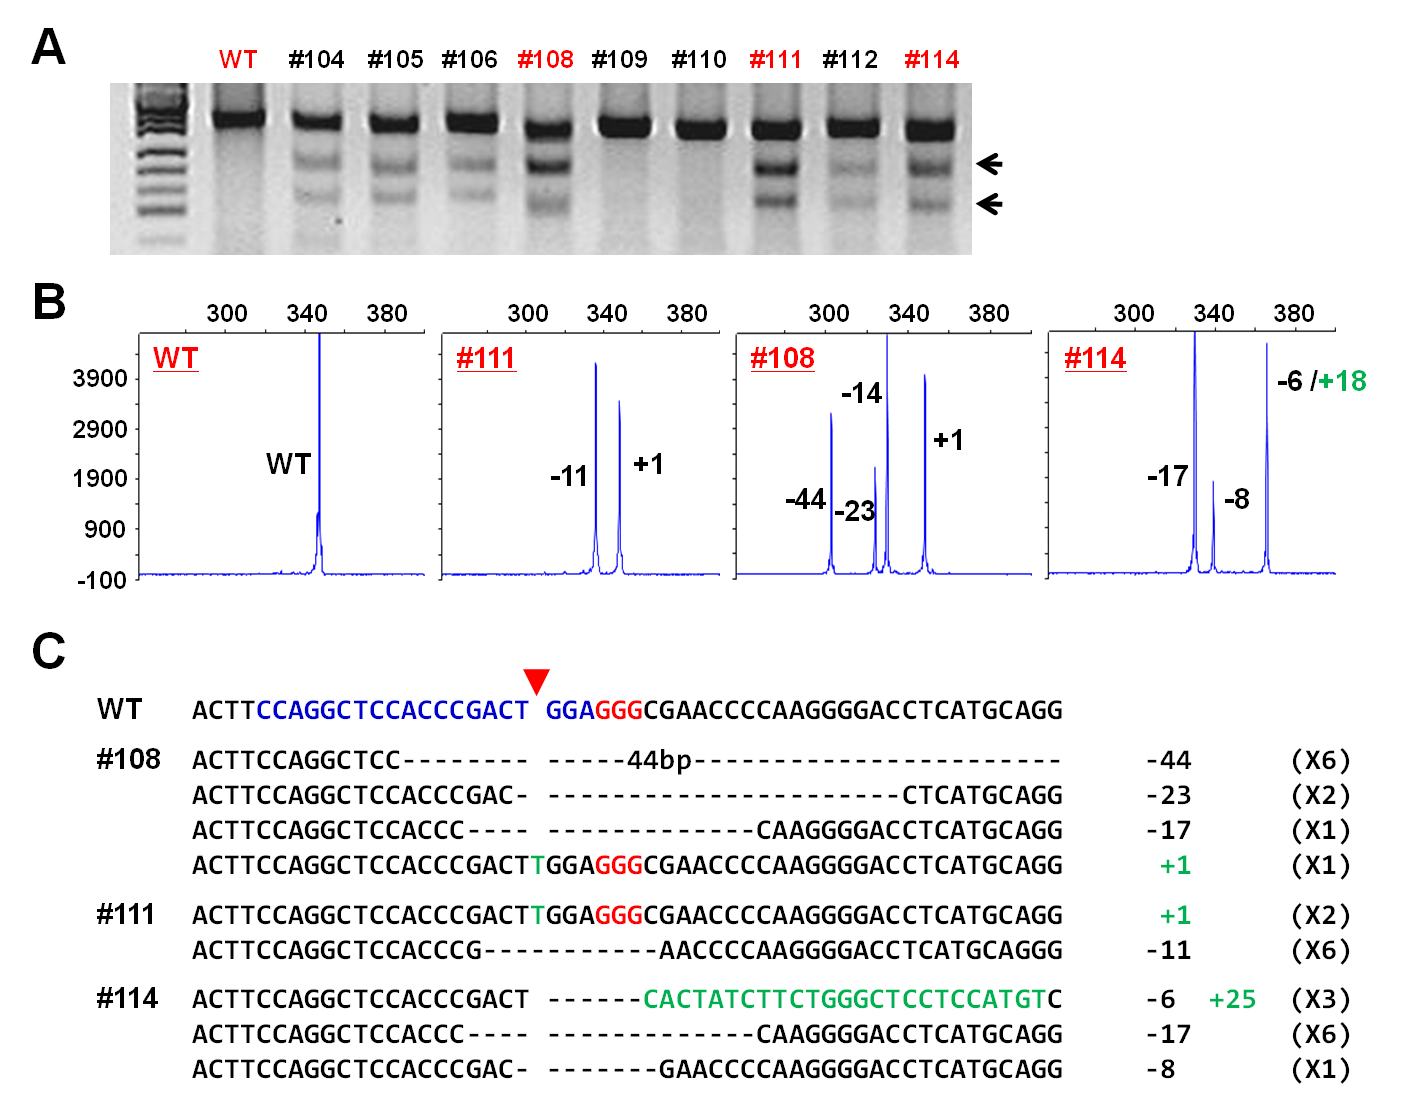


**B**


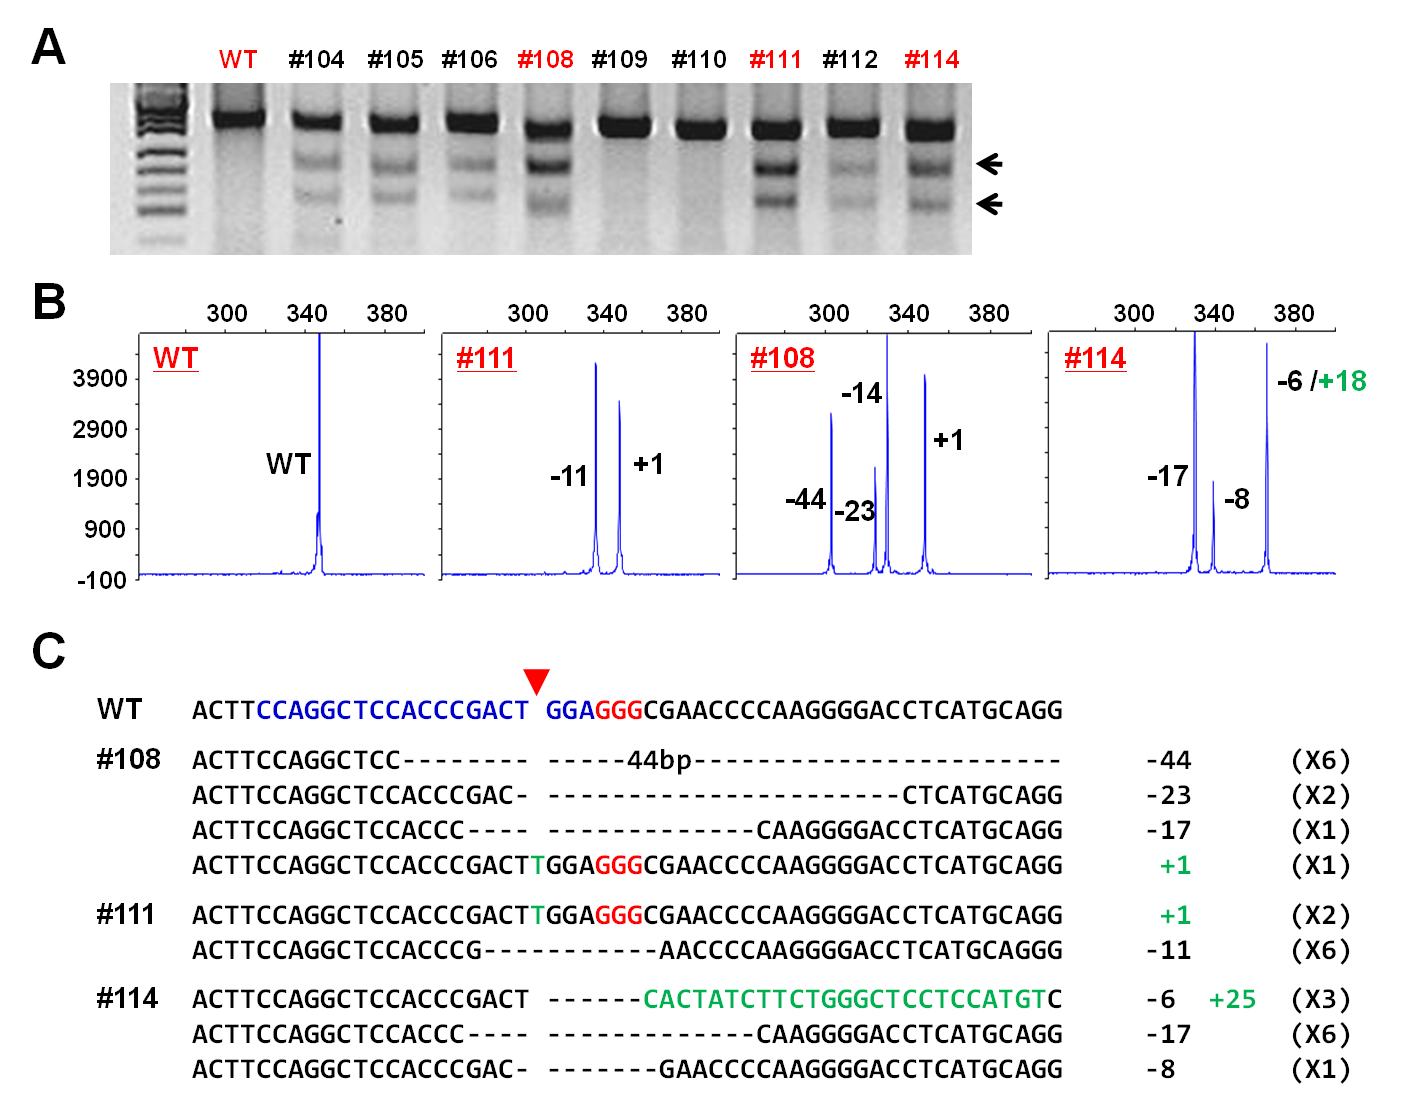


**C**


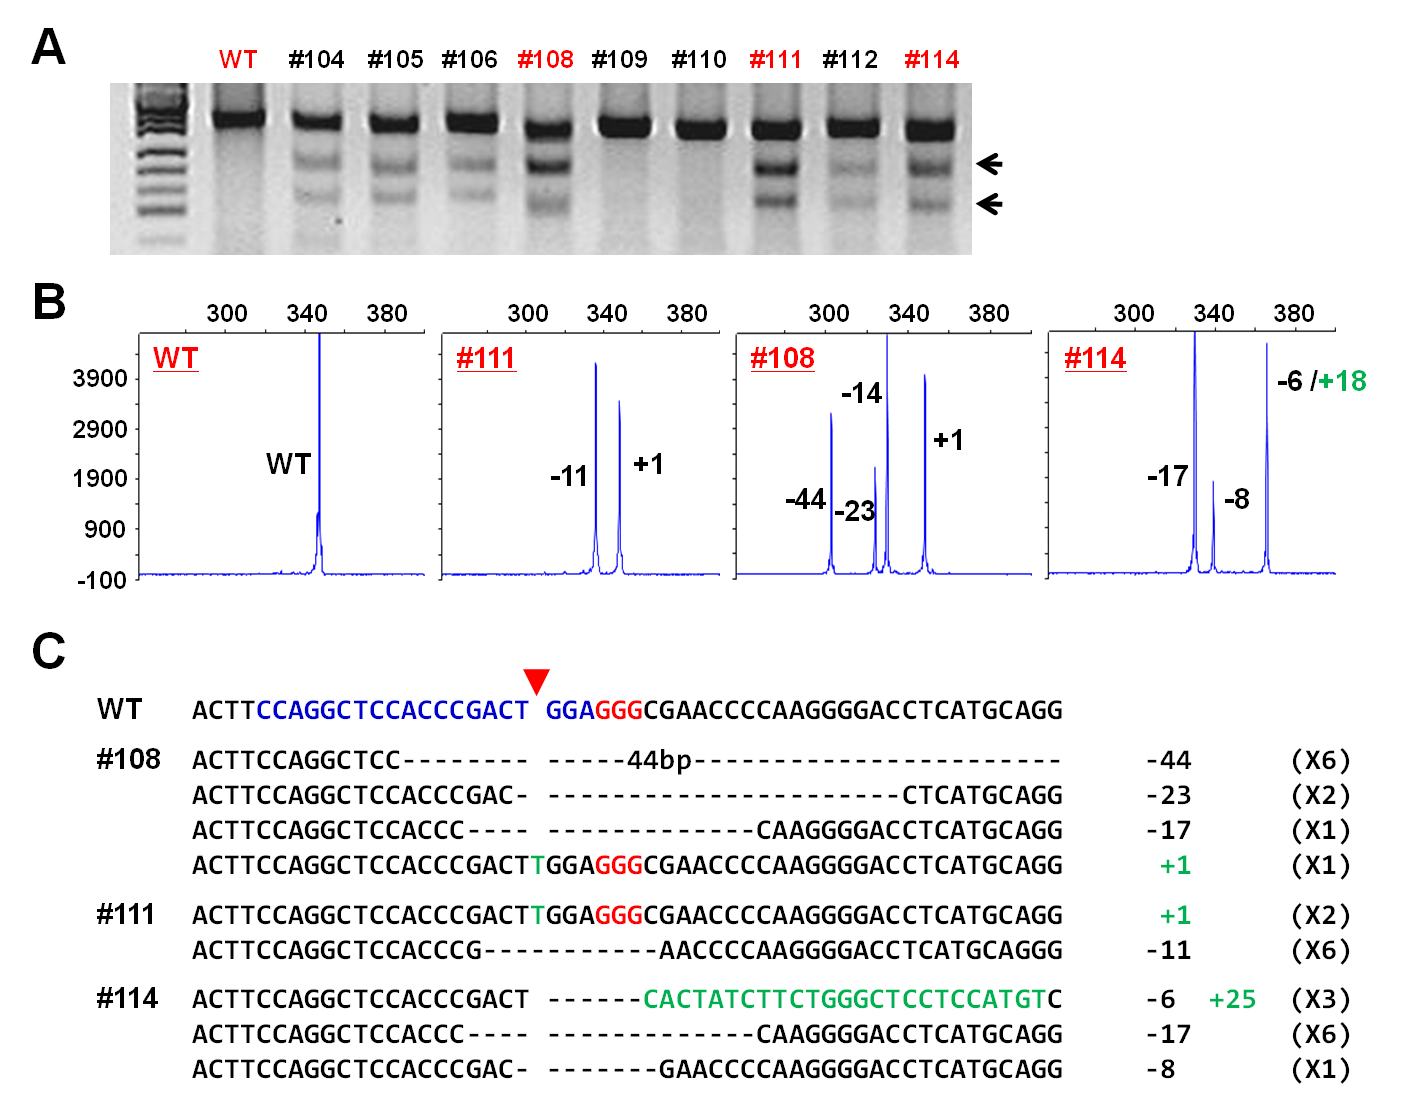


Supplemental Figure 3. RGEN-induced *Foxn1* gene knockout in mice. (*A*) Representative T7E1 assays demonstrating gene-disrupting efficiencies of *Cas9* mRNA plus *Foxn1*-specific sgRNA that were delivered via intra-cytoplasmic injection into one-cell stage mouse embryos. Numbers indicate independent founder mice generated from the highest dose. Arrows indicate bands cleaved by T7E1. (*B*) fPCR analysis showing mosaic mutations in the founder mice. (*C*) DNA sequences of mutant alleles observed in these *Foxn1* mutant founders.

**A**


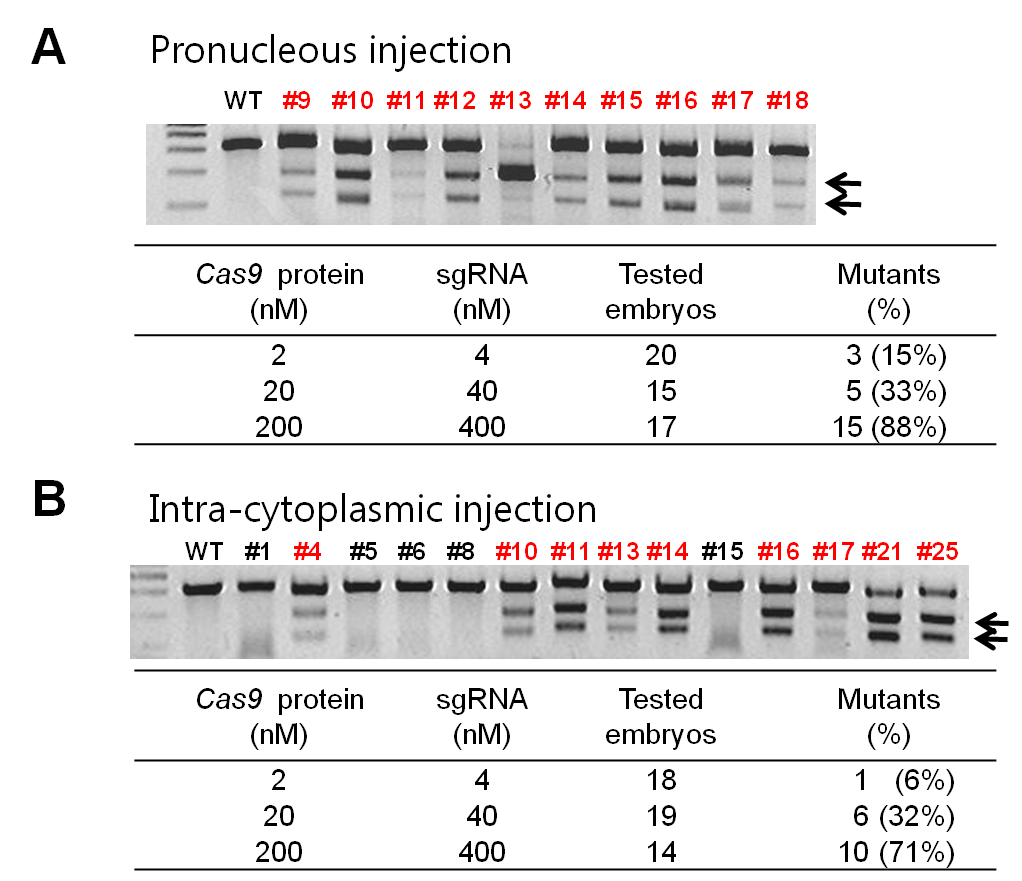


**B**


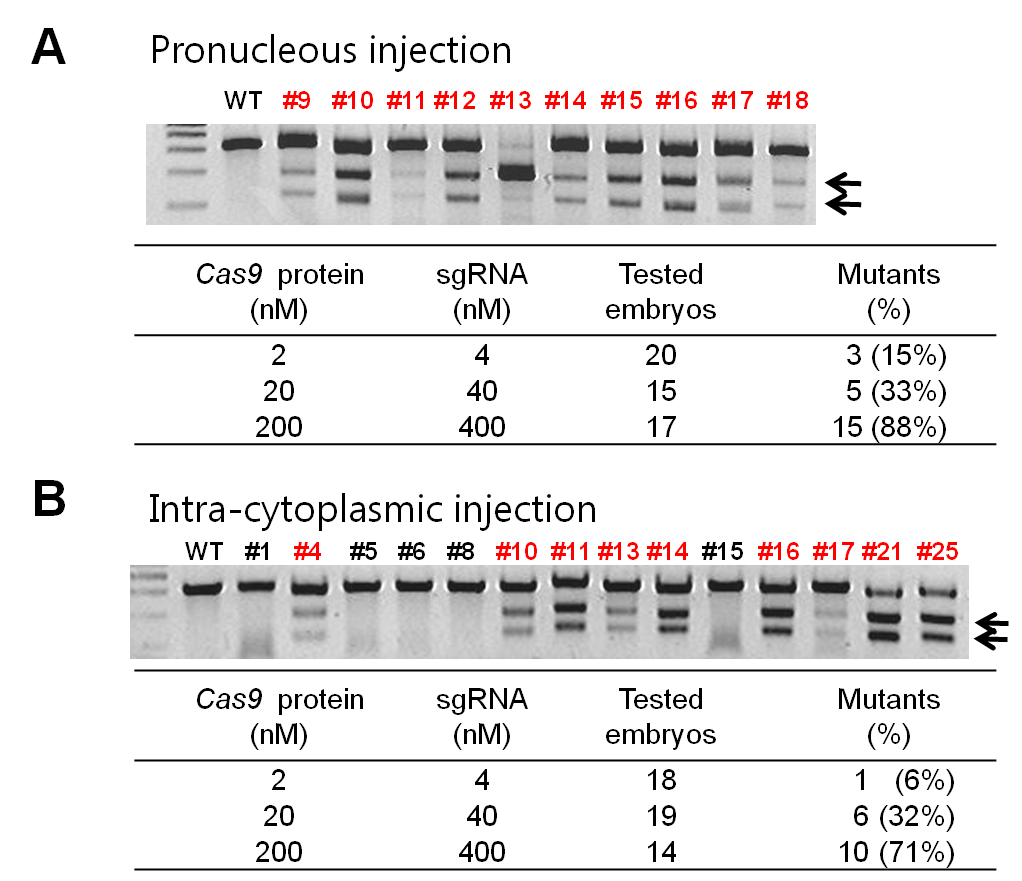

**C**


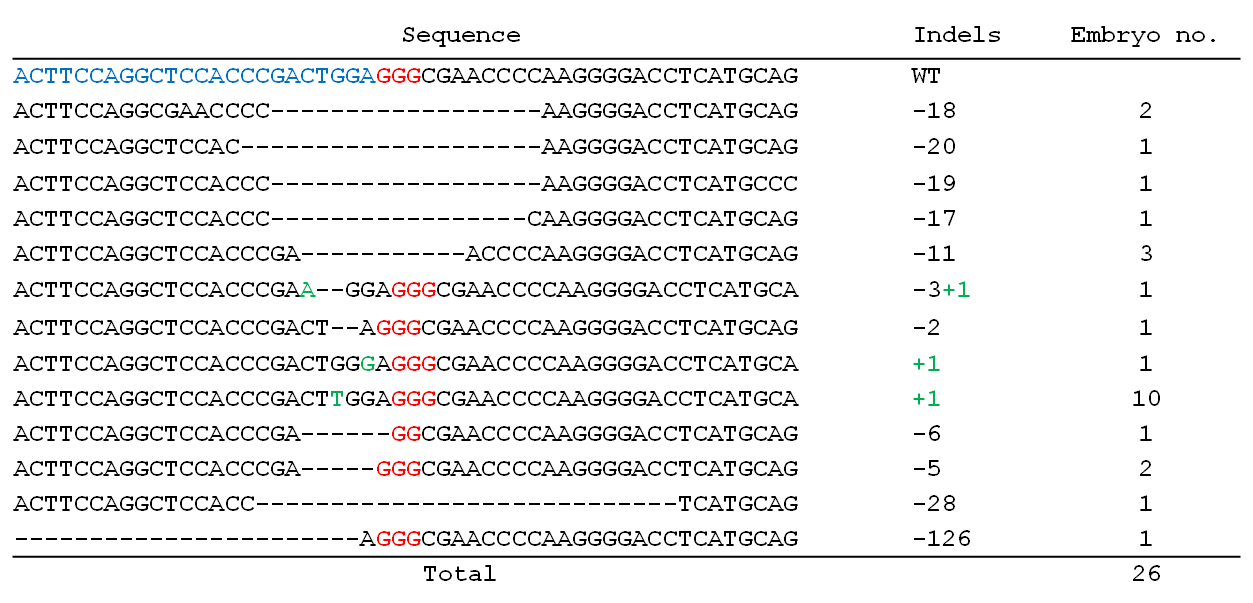


Supplemental Figure 4. *Foxn1* gene disruption in mouse embryos using the recombinant Cas9 protein: *Foxn1*-sgRNA complex. (*A* and *B*) Representative T7E1 assay results and their summaries. Embryos were cultivated *in vitro* after they underwent pronuclear (*A*) or intra-cytoplasmic (*B*) injection. Numbers in red indicate T7E1-positive mutant founder mice. (*C*) DNA sequences of *Foxn1* mutant alleles identified from the *in vitro* cultivated embryos that were obtained by the pronucleus injection of recombinant Cas9 protein: *Foxn1*-sgRNA complex at the highest dose. The target sequence of the wild-type allele is denoted in blue.


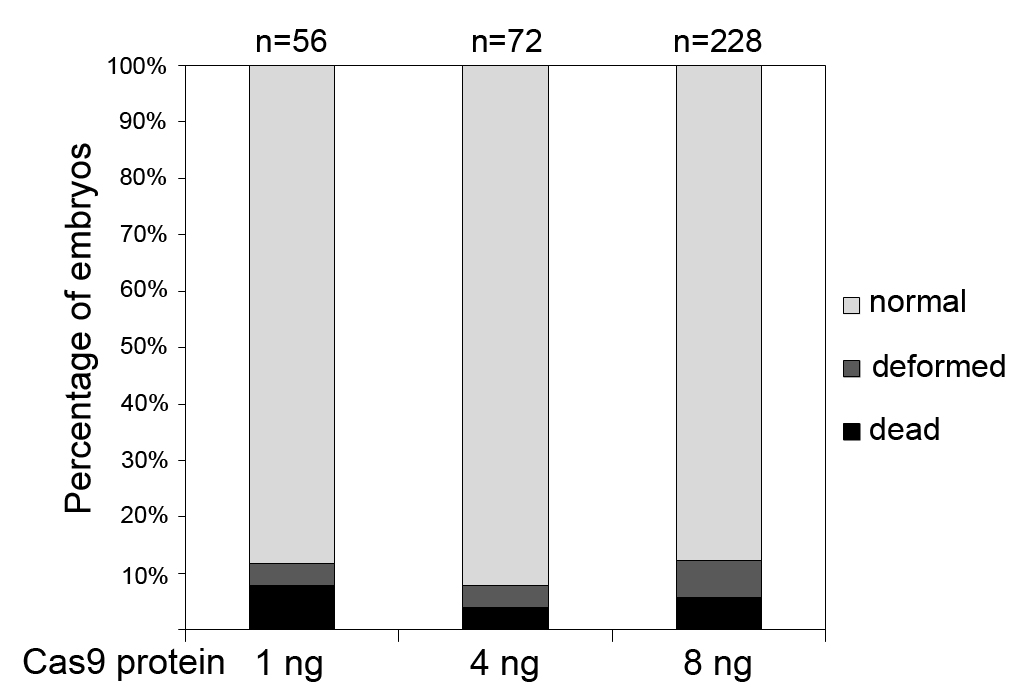


Supplemental Figure 5. Toxicities of Cas9 protein complexed with *mitfa*-specific sgRNA in zebrafish embryos. The Cas9 protein-sgRNA complex was microinjected into one-cell stage embryos with concentration of 1 ng, 4 ng, or 8 ng per embryo. After one day of injection, the number of normal, deformed, or dead embryos was scored.


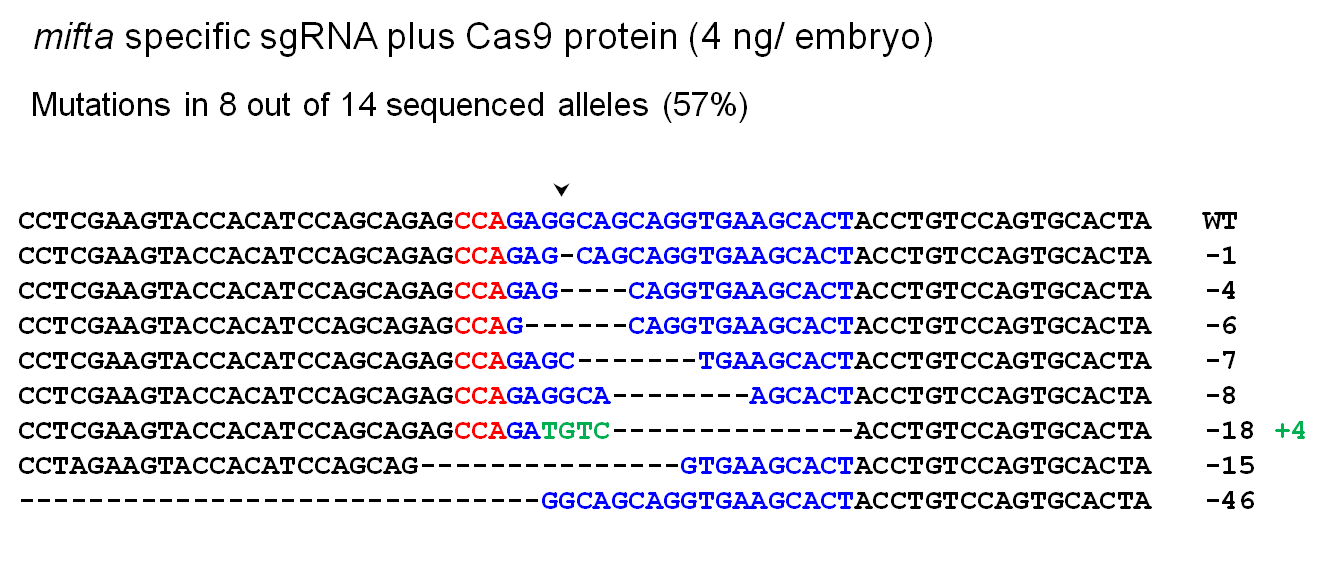


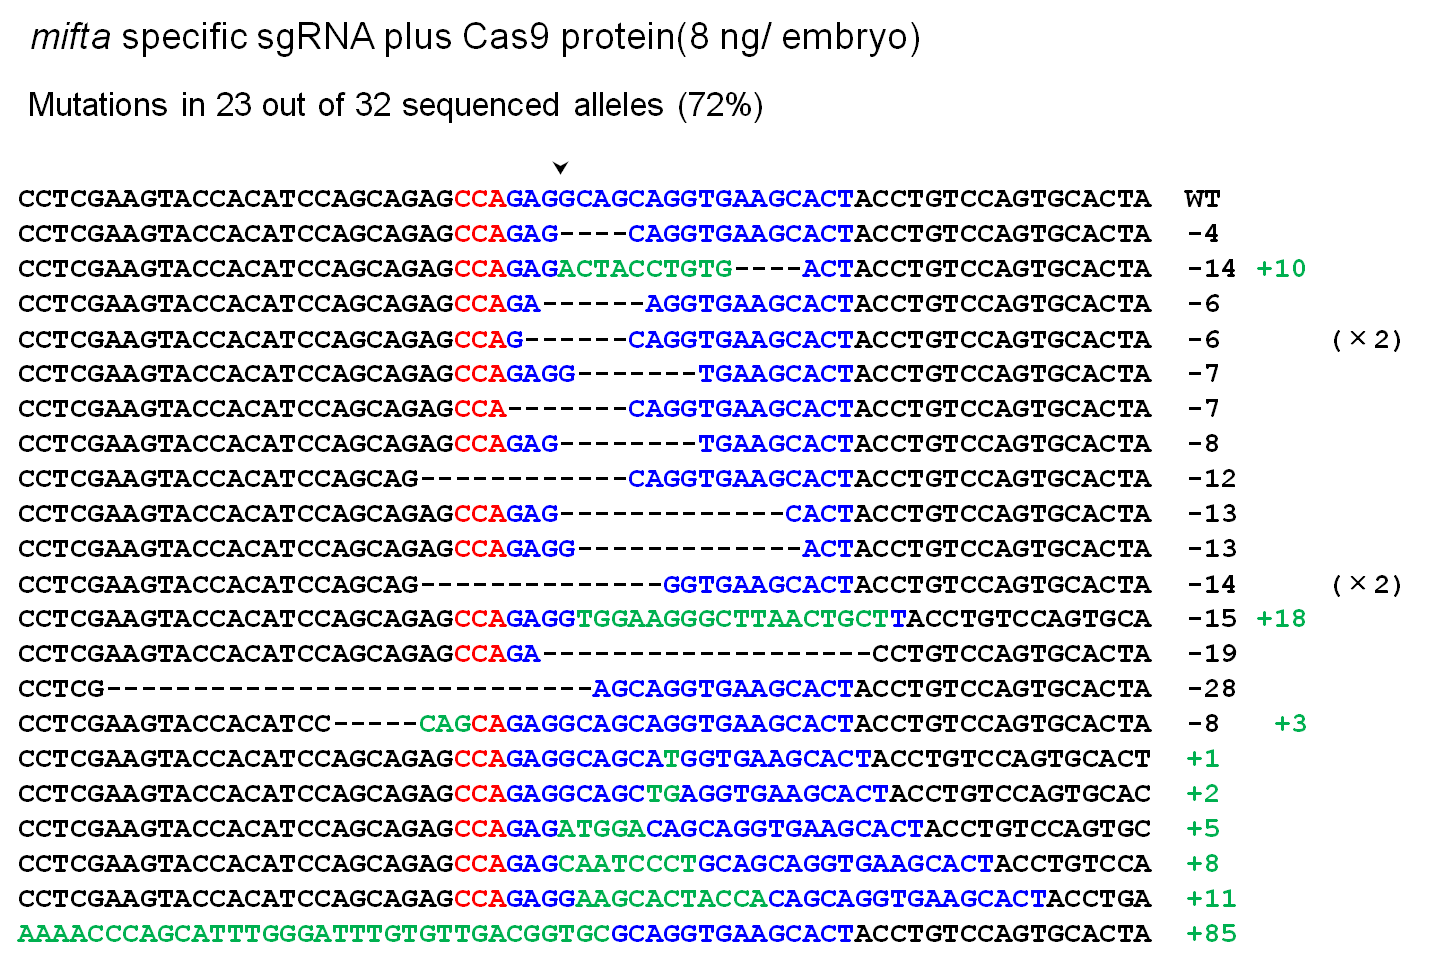


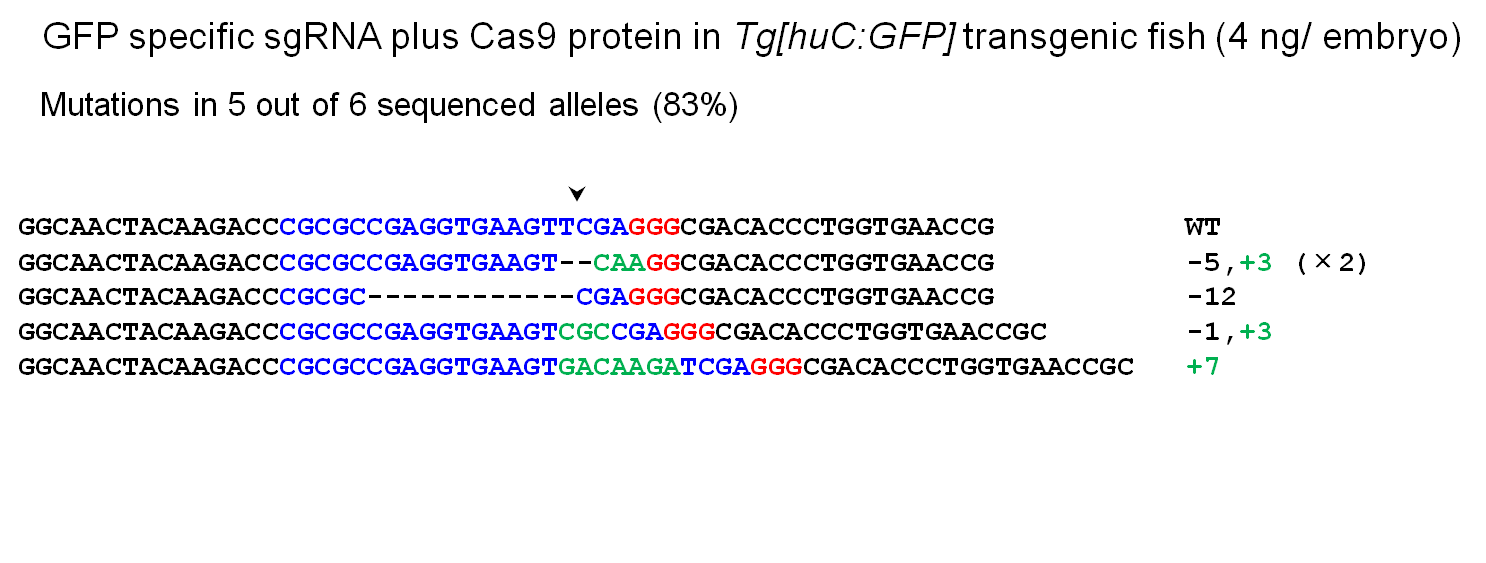


Supplemental Figure 6. Targeted indel mutations induced by Cas9 protein complex at *mitfa* and GFP reporter gene. The wild-type sequence is shown at the top, and target site in blue, and the PAM motif in red; Inserted bases highlighted as green. The column on the right indicates the number of inserted or deleted bases. Arrowheads indicate the expected RGEN cleavage site.


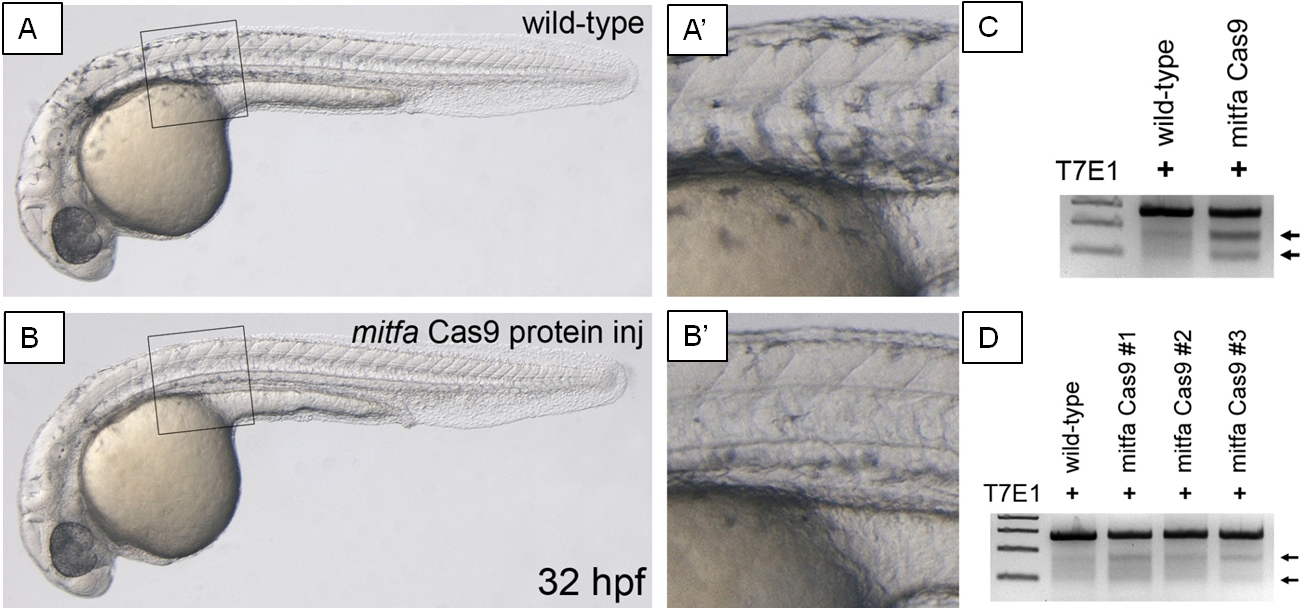


Supplemental Figure 7. Induction of somatic *mitfa* mutations by the Cas9 protein complex. (*A*) Un-injected wild-type embryo at 32 hpf. (*B*) Injection of *mitfa* Cas9 protein complex causes a defect in melanocyte development. (*A’*) and (*B’*) is a high-magnification in black box in (*A*) and (*B*), respectively. (*C*) T7E1 assay of wild-type (*A*) or *mitfa* Cas9 protein (*B*)-injected embryo. (*D***)** T7E1 assay of *mitfa* Cas9 protein-injected one-month old embryos. The somatic *mitfa* mutations remain constant in Cas9 protein-injected embryos (#1-#3) by one-month. Arrows indicate the cleavage bands by T7E1.


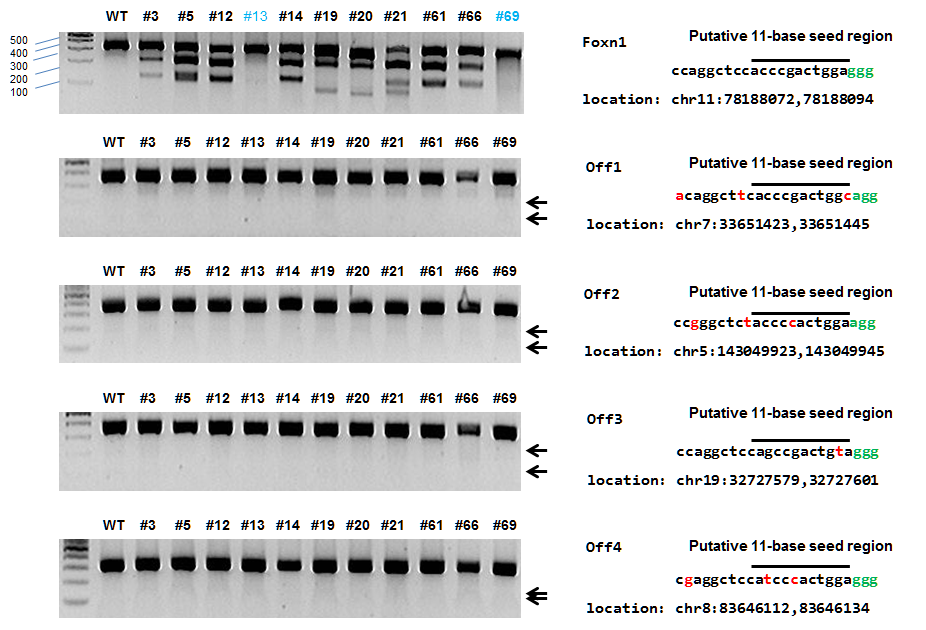


Supplemental Figure 8. Analysis of off-target activity of *Foxn1*-RGEN. T7E1 assays were conducted using DNA from the indicated *Foxn1* mutant founders. The *Foxn1* gene and putative off-target sites bearing 1~3-bp mismatches that were selected with bowtie 0.12.9 (25) were examined. Homozygous mutants or bi-allelic mutants containing large insertion are shown in blue (Table S1), mismatched bases in red, and PAM in green; black lines indicate putative 11-bp seed regions.

**A**


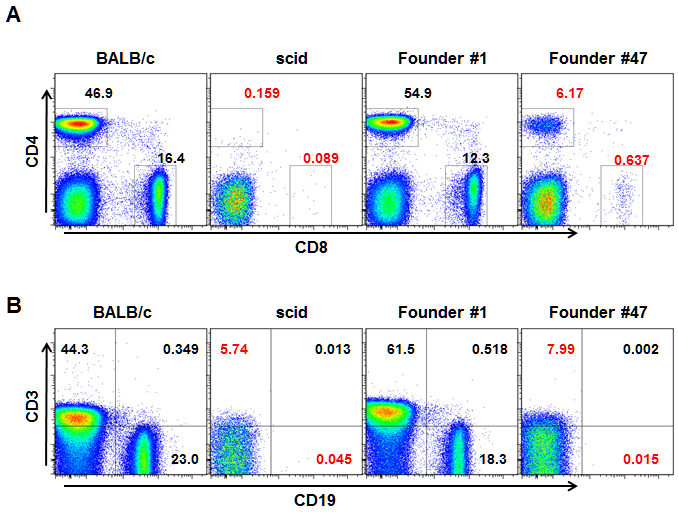


**B**


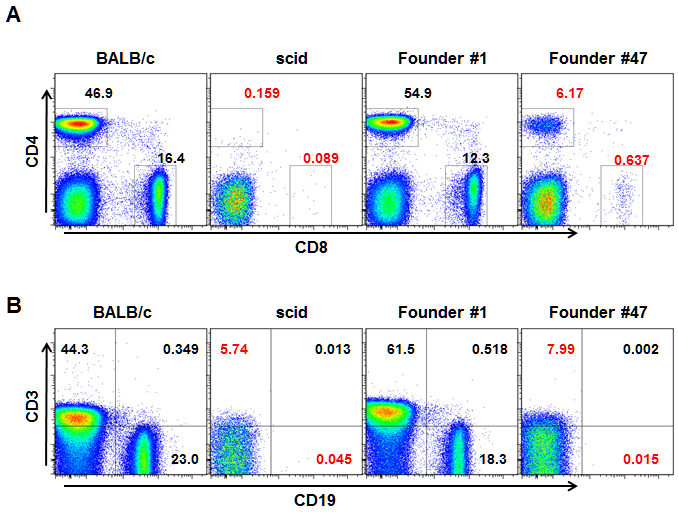


Supplemental Figure 9. Defective immune cell populations in PBMC from a bi-allelic *Prkdc* mutant founder #47. (*A*) Frequency of CD4+ and CD8+ T cells. (*B*) Frequencies of T cells (CD3+) and B cells (CD19+). The abnormal frequencies of immune cells were denoted in red. BALB/c and scid mice, positive and negative controls for B and T lymphocytes, respectively; Founder #1, mosaic mutation (Δ115/Δ3+2/+1/wild-type); founder #47, bi-allelic mutation (Δ14/ +455).

**A**


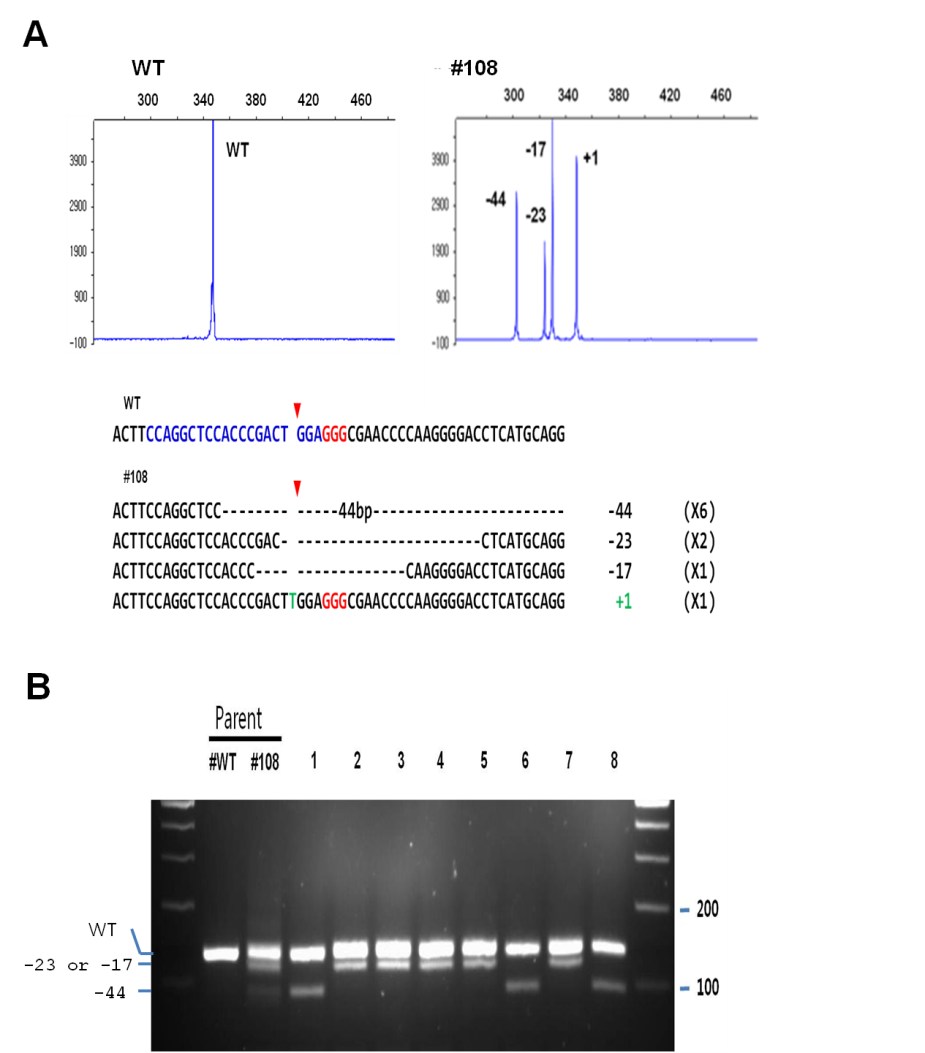

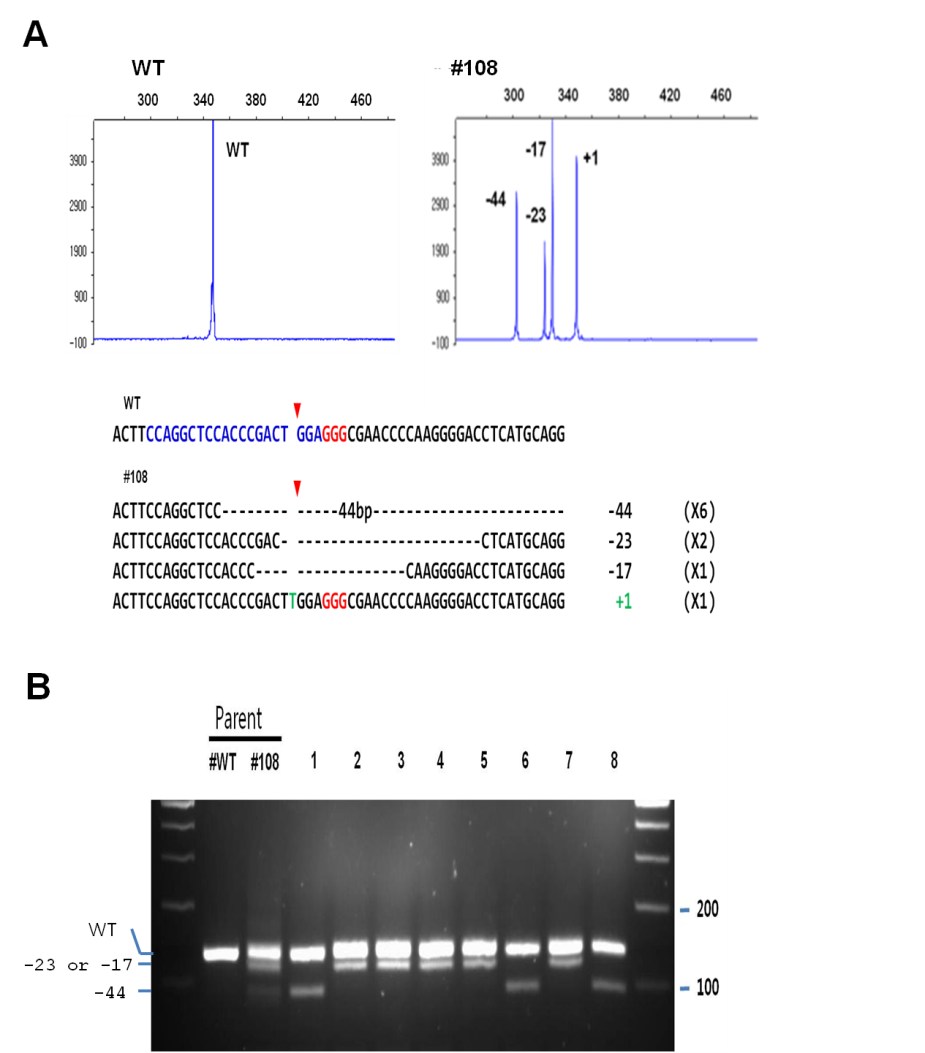


**B**


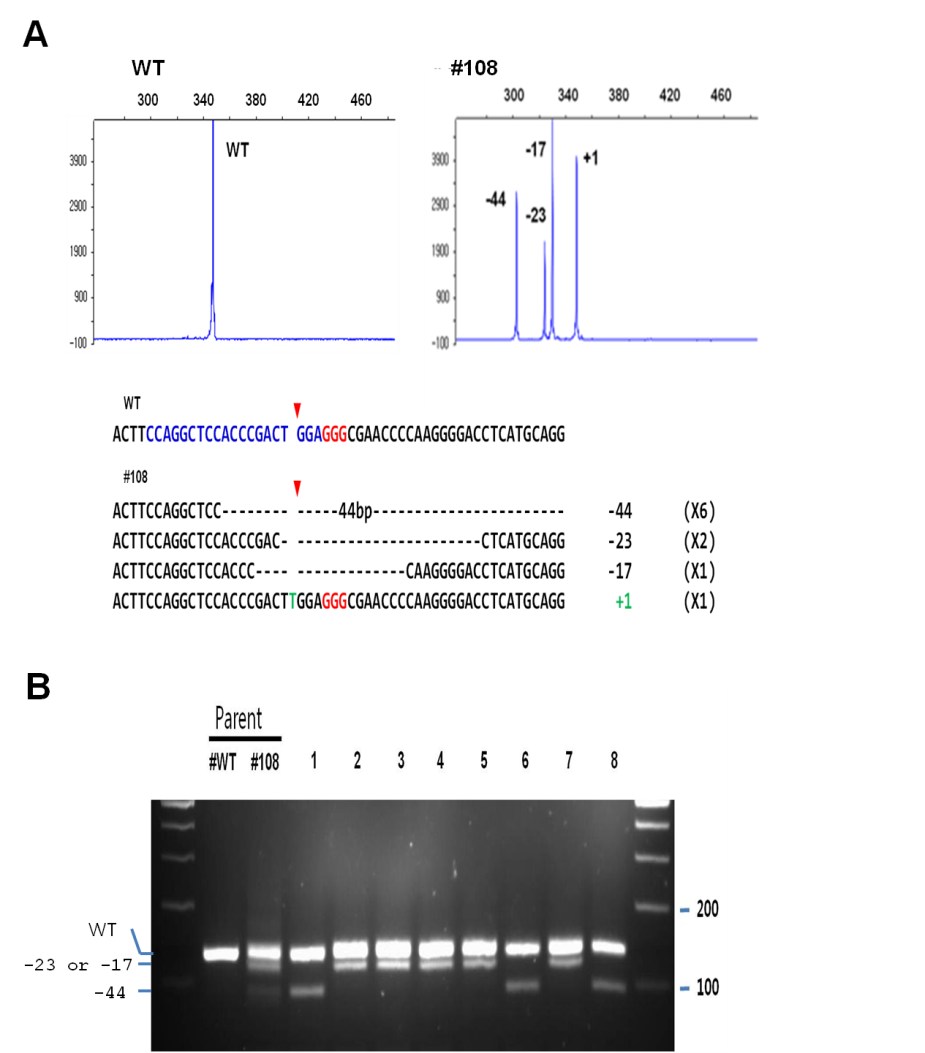


Supplemental Figure 10. Germ-line transmission of the mutant alleles found in *Foxn1* mutant founder #108. (*A*) fPCR results of wild-type and the founder mice (upper panel) and the sequences of mutant alleles (lower panel). (*B*) PCR genotyping of F1 progenies derived from crossing *Foxn1* founder #108 and wild-type FVB/NTac. Note the segregation of the mutant alleles found in *Foxn1* founder #108 in the progenies. The number of occurrences of the sequences is shown in parentheses.

Supplemental Table 1. Genotypes of *Foxn1* mutant mice.

| **Founder NO.** | **sgRNA (ng/l)** | **Genotyping Summary** | **Detected alleles** |
| --- | --- | --- | --- |
| 58* | 1 | not determined | -11 |
| 19 | 100 | bi-allelic | -60/+1 |
| 20 | 100 | bi-allelic | -67/Δ19 |
| 13 | 100 | bi-allelic | -18/+455 |
| 32 | 10 | bi-allelic | -13/-15+1 |
| 115 | 10 | bi-allelic | -18/Δ5 |
| 111 | 10 | bi-allelic | -11/+1 |
| 110 | 10 | Homozygote | -8/-8 |
| 120 | 10 | Homozygote | +2/+2 |
| 69 | 100 | Homozygote | -11/11 |
| 81 | 100 | Heterozygote | +1/WT |
| 55 | 1 | Mosaic | -18/-1/+1/+3 |
| 56 | 1 | Mosaic | -127/-41/-2/+1 |
| 127 | 1 | Mosaic | -18/+1/WT |
| 53 | 1 | Mosaic | -11/-5/-4+1/WT |
| 27 | 10 | Mosaic | -17/-5/WT |
| 29 | 10 | Mosaic | -18/-20+1/+1 |
| 95 | 10 | Mosaic | -18/-14/-8/Δ4 |
| 108 | 10 | Mosaic | +1/-17/-23/Δ44 |
| 114 | 10 | Mosaic | -17/-8/-6+25 |
| 124 | 10 | Mosaic | -11/-15+2/+1 |
| 126 | 10 | Mosaic | -17/Δ2+3/Δ12+6 |
| 12 | 100 | Mosaic | -30/-28/-17/+1 |
| 5 | 100 | Mosaic | -28/-11/-2+6/+1 |
| 14 | 100 | Mosaic | -17/-11/-10 |
| 21 | 100 | Mosaic | -127/-41/-2/-6+25 |
| 24 | 100 | Mosaic | -17/+1/WT |
| 64 | 100 | Mosaic | -31/-21/+1/WT |
| 68 | 100 | Mosaic | -17/-11/+1/WT |
| 79 | 100 | Mosaic | -22/-5/+2/WT |
| 61 | 100 | Mosaic | -21+4/-6/+1/+9 |
| 66** | 100 | Mosaic | -17/-8/-11+6/+1/WT |
| 3 | 100 | Mosaic | -11/-8/+1 |
| Underlined alleles were sequenced.  Alleles in red, detected by sequencing, but not by fPCR.  *only one clone sequenced.  **Not determined by fPCR. | | | |

Supplemental Table 2. Genotypes of *Prkdc* mutant mice.

| **Founder no.** | **sgRNA (ng/l)** | **Genotyping Summary** | **Detected alleles** |
| --- | --- | --- | --- |
| 7* | 250 | not determined | -21/WT |
| 4 | 250 | bi-allelic | -21/+1 |
| 47 | 250 | bi-allelic | -14/ +455 |
| 37 | 50 | Heterozygote | +2/WT |
| 39 | 50 | Heterozygote | +3/WT |
| 70 | 50 | Heterozygote | -11/WT |
| 71 | 50 | Heterozygote | -12/WT |
| 72 | 50 | Heterozygote | -12/WT |
| 90 | 50 | Heterozygote | -2/WT |
| 53 | 100 | Heterozygote | -10/WT |
| 67 | 100 | Heterozygote | -2/WT |
| 8 | 250 | Heterozygote | +2/WT |
| 14 | 250 | Heterozygote | -6/WT |
| 16 | 250 | Heterozygote | -8/WT |
| 17 | 250 | Heterozygote | -21/WT |
| 23 | 250 | Heterozygote | -13/WT |
| 44 | 250 | Heterozygote | -2/WT |
| 45 | 250 | Heterozygote | -21/WT |
| 48 | 250 | Heterozygote | -7/WT |
| 76 | 50 | Mosaic | +1/+2/WT |
| 80 | 50 | Mosaic | -4/-4+252/WT |
| 81 | 50 | Mosaic | -4/-12/WT |
| 85 | 50 | Mosaic | -21/-3+1/WT |
| 86 | 50 | Mosaic | -4/+1/WT |
| 33 | 100 | Mosaic | -4/+2/WT |
| 54 | 100 | Mosaic | -7+28/-12+30/WT |
| 64 | 100 | Mosaic | -3+97/-4/WT |
| 66 | 100 | Mosaic | -3/+1/WT |
| 55 | 100 | Mosaic | -7/-6+2/WT |
| 1 | 250 | Mosaic | -115/-3+2/+1/WT |
| 5 | 250 | Mosaic | -4/+5/+9/WT |
| 11 | 250 | Mosaic | -2/+2/WT |
| 12 | 250 | Mosaic | -14/+1/WT |
| 15 | 250 | Mosaic | -5+1/+7/+12/WT |
| 18 | 250 | Mosaic | -1+32/-4/WT |
| 25 | 250 | Mosaic | -269/-61/WT |
| 26 | 250 | Mosaic | -6+2/-2/WT |
| 50 | 250 | Mosaic | -13/-2/-1/WT |
| 51 | 250 | Mosaic | -15/Δ12/-4 |
| Underlined alleles were sequenced.  Alleles in red, detected by sequencing, but not by fPCR.  *Not determined by fPCR. | | | |

Supplemental Table 3. DNA sequences of *Foxn1* mutant alleles identified from a subset of T7E1-positive mutant founders.

| **ACTTCCAGGCTCCACCCGACTGGAGGGCGAACCCCAAGGGGACCTCATGCAGG** | **del+ins** | **#** | **Founder mice** |
| --- | --- | --- | --- |
| **ACTTCCAGGC-------------------AACCCCAAGGGGACCTCATGCAGG** | **-19** | **1** | **20** |
| **ACTTCCAGGC------------------GAACCCCAAGGGGACCTCATGCAGG** | **-18** | **1** | **115** |
| **ACTTCCAGGCTCC----------------------------------------** | **-60** | **1** | **19** |
| **ACTTCCAGGCTCC----------------------------------------** | **-44** | **1** | **108** |
| **ACTTCCAGGCTCC---------------------CAAGGGGACCTCATGCAGG** | **-21** | **1** | **64** |
| **ACTTCCAGGCTCC------------TTAGGAGGCGAACCCCAAGGGGACCTCA** | **-12+6** | **1** | **126** |
| **ACTTCCAGGCTCCACC----------------------------TCATGCAGG** | **-28** | **1** | **5** |
| **ACTTCCAGGCTCCACCC---------------------CCAAGGGACCTCATG** | **-21+4** | **1** | **61** |
| **ACTTCCAGGCTCCACCC------------------AAGGGGACCTCATGCAGG** | **-18** | **2** | **95, 29** |
| **ACTTCCAGGCTCCACCC-----------------CAAGGGGACCTCATGCAGG** | **-17** | **7** | **12, 14, 27, 66, 108, 114, 126** |
| **ACTTCCAGGCTCCACCC---------------ACCCAAGGGGACCTCATGCAG** | **-15+1** | **1** | **32** |
| **ACTTCCAGGCTCCACCC---------------CACCCAAGGGGACCTCATGCA** | **-15+2** | **1** | **124** |
| **ACTTCCAGGCTCCACCC-------------ACCCCAAGGGGACCTCATGCAGG** | **-13** | **1** | **32** |
| **ACTTCCAGGCTCCACCC--------GGCGAACCCCAAGGGGACCTCATGCAGG** | **-8** | **1** | **110** |
| **ACTTCCAGGCTCCACCCT-------------------GGGGACCTCATGCAGG** | **-20+1** | **1** | **29** |
| **ACTTCCAGGCTCCACCCG-----------AACCCCAAGGGGACCTCATGCAGG** | **-11** | **1** | **111** |
| **ACTTCCAGGCTCCACCCGA----------------------ACCTCATGCAGG** | **-22** | **1** | **79** |
| **ACTTCCAGGCTCCACCCGA------------------GGGGACCTCATGCAGG** | **-18** | **2** | **13, 127** |
| **ACTTCCAGGCTCCACCCCA-----------------AGGGGACCTCATGCAGG** | **-17** | **1** | **24** |
| **ACTTCCAGGCTCCACCCGA-----------ACCCCAAGGGGACCTCATGCAGG** | **-11** | **5** | **14, 53, 58, 69, 124** |
| **ACTTCCAGGCTCCACCCGA---------–GACCCCAAGGGGACCTCATGCAGG** | **-10** | **1** | **14** |
| **ACTTCCAGGCTCCACCCGA-----GGGCGAACCCCAAGGGGACCTCATGCAGG** | **-5** | **3** | **53, 79, 115** |
| **ACTTCCAGGCTCCACCCGAC-----------------------CTCATGCAGG** | **-23** | **1** | **108** |
| **ACTTCCAGGCTCCACCCGAC-----------CCCCAAGGGGACCTCATGCAGG** | **-11** | **1** | **3** |
| **ACTTCCAGGCTCCACCCGAC-----------GAAGGGCCCCAAGGGGACCTCA** | **-11+6** | **1** | **66** |
| **ACTTCCAGGCTCCACCCGAC--------GAACCCCAAGGGGACCTCATGCAGG** | **-8** | **2** | **3, 66** |
| **ACTTCCAGGCTCCACCCGAC-----GGCGAACCCCAAGGGGACCTCATGCAGG** | **-5** | **1** | **27** |
| **ACTTCCAGGCTCCACCCGAC––GTGCTTGAGGGCGAACCCCAAGGGGACCTCA** | **-2+6** | **2** | **5** |
| **ACTTCCAGGCTCCACCCGACT------CACTATCTTCTGGGCTCCTCCATGTC** | **-6+25** | **2** | **21, 114** |
| **ACTTCCAGGCTCCACCCGACT----TGGCGAACCCCAAGGGGACCTCATGCAG** | **-4+1** | **1** | **53** |
| **ACTTCCAGGCTCCACCCGACT--TGCAGGGCGAACCCCAAGGGGACCTCATGC** | **-2+3** | **1** | **126** |
| **ACTTCCAGGCTCCACCCGACTTGGAGGGCGAACCCCAAGGGGACCTCATGCAG** | **+1** | **15** | **3, 5, 12, 19, 29, 55, 56, 61, 66, 68, 81, 108, 111, 124, 127** |
| **ACTTCCAGGCTCCACCCGACTTTGGAGGGCGAACCCCAAGGGGACCTCATGCA** | **+2** | **2** | **79, 120** |
| **ACTTCCAGGCTCCACCCGACTGTTGGAGGGCGAACCCCAAGGGGACCTCATGC** | **+3** | **1** | **55** |
| **ACTTCCAGGCTCCACCCGACTGGAG(+455)GGCGAACCCCAAGGGGACCTCC** | **+455** | **1** | **13** |

Supplemental Table 4. DNA sequences of *Prkdc* mutant alleles.

| **TTGGTTTGCTTGTGTTTATCCGGAAGTCGCTTAGCATTGAGGACGTAAGTATGAT** | **del+ins** | **#** | **founders** |
| --- | --- | --- | --- |
| **TTGGTTT--------------GGAAGTCGCTTAGCATTGAGGACGTAAGTATGAT** | **-14** | **1** | **47** |
| **TTGGTTT-----------TCCGGAAGTCGCTTAGCATTGAGGACGTAAGTATGAT** | **-11** | **1** | **70** |
| **TTGGTTTG---------------AAGTCGCTTAGCATTGAGGACGTAAGTATGAT** | **-15** | **1** | **51** |
| **TAGGTTTG------------TCCGTGTCGTTTGGCATGGAGGACGTTCAACGGAA** | **-12+30** | **1** | **54** |
| **TTGGTTTG----TGTTTATCCGGAAGTCGCTTAGCATTGAGGACGTAAGTATGAT** | **-4** | **1** | **81** |
| **TTGGTTTGC------------GGAAGTCGCTTAGCATTGAGGACGTAAGTATGAT** | **-12** | **1** | **72** |
| **TTGGTTTGCTT---------------------AGCATTGAGGACGTAAGTATGAT** | **-21** | **4** | **4, 7, 17, 85** |
| **TTGGTTTGCTT-------------AGTCGCTTAGCATTGAGGACGTAAGTATGAT** | **-13** | **1** | **23** |
| **TTGGTTTGCTT--------CCGGAAGTCGCTTAGCATTGAGGACGTAAGTATGAT** | **-8** | **1** | **16** |
| **TTGGTTTGCTT------TGATCCGGAAGTCGCTTAGCATTGAGGACGTAAGTATG** | **-6+2** | **1** | **26** |
| **TTGGTTTGCTTG-----AATCCGGAAGTCGCTTAGCATTGAGGACGTAAGTATGA** | **-5+1** | **1** | **15** |
| **TTGGTTTGCTT--------------------------------------------** | **-61** | **1** | **25** |
| **TTGGTTTGCTTGT------------------------------------------** | **-115** | **1** | **1** |
| **TTGGTTTGCTTGT--------------CGCTTAGCATTGAGGACGTAAGTATGAT** | **-14** | **1** | **12** |
| **TTGGTTTGCTTGT-//–ATCCGGAAGTCGCTTAGCATTGAGGACGTAAGTATGAT** | **-4+252** | **1** | **80** |
| **TTGGTTTGCTTGTG---ATCCGGAAGTCGCTTAGCATTGAGGACGTAAGTATGAT** | **-3** | **1** | **66** |
| **TTGGTTTGCTTGTGT------------CGCTTAGCATTGAGGACGTAAGTATGAT** | **-12** | **2** | **71, 81** |
| **TTGGTTTGCTTGTGT-------CG*C*TTAGCATTGGGGACGCTCAATTGAAGAAGT** | **-7+28** | **1** | **54** |
| **TTGGTTTGCTTGTGT----CCGGAAGTCGCTTAGCATTGAGGACGTAAGTATGAT** | **-4** | **3** | **33, 64, 86** |
| **TTGGTTTGCTTGTGT---GTCCGGAAGTCGCTTAGCATTGAGGACGTAAGTATGA** | **-3+1** | **1** | **85** |
| **TTGGTTTGCTTGTGT---CTTCCGGAAGTCGCTTAGCATTGAGGACGTAAGTATG** | **-3+2** | **1** | **1** |
| **TTGGTTTGCTTGTGT--ATCCGGAAGTCGCTTAGCATTGAGGACGTAAGTATGAT** | **-2** | **1** | **44** |
| **TTGGTTTGCTTGTGT-ACATATCCGTGTACATATCCGTGTACAGTACATATCCGG** | **-1+32** | **1** | **18** |
| **TTGGTTTGCTTGTGTT-/-CCGGAAGTCGCTTAGCATTGAGGACGTAAGTATGAT** | **-3+97** | **1** | **64** |
| **TTGGTTTGCTTGTGTT--TCCGGAAGTCGCTTAGCATTGAGGACGTAAGTATGAT** | **-2** | **1** | **26** |
| **TTGGTTTGCTTGTGTT/ATCCGGAAGTCGCTTAGCATTGAGGACGTAAGTATGAT** | **-1+220** | **1** | **47** |
| **TTGGTTTGCTTGTGTTT--CCGGAAGTCGCTTAGCATTGAGGACGTAAGTATGAT** | **-2** | **2** | **50, 67** |
| **TTGGTTTGCTTGTGTTTA------AGTCGCTTAGCATTGAGGACGTAAGTATGAT** | **-6** | **1** | **14** |
| **TTGGTTTGCTTGTGTTTAATCCGGAAGTCGCTTAGCATTGAGGACGTAAGTATGA** | **+1** | **1** | **1** |
| **TTGGTTTGCTTGTGTTTTATCCGGAAGTCGCTTAGCATTGAGGACGTAAGTATGA** | **+1** | **3** | **12, 66, 86** |
| **TTGGTTTGCTTGTGTTTCATCCGGAAGTCGCTTAGCATTGAGGACGTAAGTATGA** | **+1** | **2** | **4, 76** |
| **TTGGTTTGCTTGTGTTTTTATCCGGAAGTCGCTTAGCATTGAGGACGTAAGTATG** | **+2** | **1** | **76** |
| **TTGGTTTGCTTGTGTTTCCATCCGGAAGTCGCTTAGCATTGAGGACGTAAGTATG** | **+2** | **1** | **8** |
| **-----------------------------CGCTTAGCATTGAGGACGTAAGTATG** | **-269** | **1** | **25** |

Supplemental Table 5. Oligonucletide for preparation of *in vitro* RNA transcription template.

| **RNA Name** | **Direction** | **Sequence (5' to 3')** |
| --- | --- | --- |
| *Foxn1* #1 sgRNA | F | GAAATTAATACGACTCACTATAGGCAGTCTGACGTCACACTTCCGTTTTAGAGCTAGAAATAGCAAGTTAAAATAAGGCTAGTCCG |
| *Foxn1* #2 sgRNA | F | GAAATTAATACGACTCACTATAGGACTTCCAGGCTCCACCCGACGTTTTAGAGCTAGAAATAGCAAGTTAAAATAAGGCTAGTCCG |
| *Foxn1* #3 sgRNA | F | GAAATTAATACGACTCACTATAGGCCAGGCTCCACCCGACTGGAGTTTTAGAGCTAGAAATAGCAAGTTAAAATAAGGCTAGTCCG |
| *Foxn1* #4 sgRNA | F | GAAATTAATACGACTCACTATAGGACTGGAGGGCGAACCCCAAGGTTTTAGAGCTAGAAATAGCAAGTTAAAATAAGGCTAGTCCG |
| *Foxn1* #5 sgRNA | F | GAAATTAATACGACTCACTATAGGACCCCAAGGGGACCTCATGCGTTTTAGAGCTAGAAATAGCAAGTTAAAATAAGGCTAGTCCG |
| *Prkdc* #1 sgRNA | F | GAAATTAATACGACTCACTATAGGTTAGTTTTTTCCAGAGACTTGTTTTAGAGCTAGAAATAGCAAGTTAAAATAAGGCTAGTCCG |
| *Prkdc* #2 sgRNA | F | GAAATTAATACGACTCACTATAGGTTGGTTTGCTTGTGTTTATCGTTTTAGAGCTAGAAATAGCAAGTTAAAATAAGGCTAGTCCG |
| *Prkdc* #3 sgRNA | F | GAAATTAATACGACTCACTATAGGCACAAGCAAACCAAAGTCTCGTTTTAGAGCTAGAAATAGCAAGTTAAAATAAGGCTAGTCCG |
| *Prkdc* #4 sgRNA | F | GAAATTAATACGACTCACTATAGGCCTCAATGCTAAGCGACTTCGTTTTAGAGCTAGAAATAGCAAGTTAAAATAAGGCTAGTCCG |
| eGFP sgRNA | F | GAAATTAATACGACTCACTATAGGCGCGCCGAGGTGAAGTTCGAGTTTTAGAGCTAGAAATAGCAAGTTAAAATAAGGCTAGTCCG |
| sgRNA Reverse | R | AAAAAAAGCACCGACTCGGTGCCACTTTTTCAAGTTGATAACGGACTAGCCTTATTTTAAC |
| *mitfa* crRNA | F | GAAATTAATACGACTCACTATAGGAGTGCTTCACCTGCTGCCTCGTTTTAGAGCTATGCTGTTTTG |
| *mitfa* crRNA | R | CAAAACAGCATAGCTCTAAAACGAGGCAGCAGGTGAAGCACTCCTATAGTGAGTCGTATTAATTTC |
| TracrRNA | F | GAAATTAATACGACTCACTATAGGAACCATTCAAAACAGCATAGCAAGTTAAAATAAGGCTAGTCCG |
| TracrRNA | R | AAAAAAAGCACCGACTCGGTGCCACTTTTTCAAGTTGATAACGGACTAGCCTTATTTTAACTTGCTATG |

a F, forward; R, reverse

b Sequences complementary to target DNA are shown in blue. The T7 promoter sequence is underlined.

Supplemental Table 6. Primer sequences used in T7E1 assay and fPCR analysis.

| **Gene** | **Direction** | **Sequence(5' to 3')** |
| --- | --- | --- |
| *Foxn1* | F1 | GTCTGTCTATCATCTCTTCCCTTCTCTCC |
| F2 | TCCCTAATCCGATGGCTAGCTCCAG |
| R1 | ACGAGCAGCTGAAGTTAGCATGC |
| R2 | CTACTCAATGCTCTTAGAGCTACCAGGCTTGC |
| *Prkdc* | F1 | GACTGTTGTGGGGAGGGCCG |
| F2 | GGGAGGGCCGAAAGTCTTATTTTG |
| R1 | CCTGAAGACTGAAGTTGGCAGAAGTGAG |
| R2 | CTTTAGGGCTTCTTCTCTACAATCACG |
| eGFP | F | CAAGGGCGAGGAGCTGTTCACC |
| R | CGGCCATGATATAGACGTTGTGG |
| *mitfa* | F | GTAGAATGTGAGCTTATTGGCGT |
| R | TCTCACAGTTGAGGGTGAGAAGG |

Supplemental Table 7. Primers used for amplification of off-target sites.

| **Gene** | **Notation** | **Direction** | **Sequence(5' to 3')** |
| --- | --- | --- | --- |
| *Foxn1* | off 1 | F | CTCGGTGTGTAGCCCTGAC |
| R | AGACTGGCCTGGAACTCACAG |
| off 2 | F | CACTAAAGCCTGTCAGGAAGCCG |
| R | CTGTGGAGAGCACACAGCAGC |
| off 3 | F | GCTGCGACCTGAGACCATG |
| R | CTTCAATGGCTTCCTGCTTAGGCTAC |
| off 4 | F | GGTTCAGATGAGGCCATCCTTTC |
| R | CCTGATCTGCAGGCTTAACCCTTG |
| *Prkdc* | off 1 | F | CTCACCTGCACATCACATGTGG |
| R | GGCATCCACCCTATGGGGTC |
| off 2 | F | GCCTTGACCTAGAGCTTAAAGAGCC |
| R | GGTCTTGTTAGCAGGAAGGACACTG |
| off 3 | F | AAAACTCTGCTTGATGGGATATGTGGG |
| R | CTCTCACTGGTTATCTGTGCTCCTTC |
| off 4 | F | GGATCAATAGGTGGTGGGGGATG |
| R | GTGAATGACACAATGTGACAGCTTCAG |
| off 5 | F | CACAAGACAGACCTCTCAACATTCAGTC |
| R | GTGCATGCATATAATCCATTCTGATTGCTCTC |
| off 6 | F1 | GGGAGGCAGAGGCAGGT |
| F2 | GGATCTCTGTGAGTTTGAGGCCA |
| R1 | GCTCCAGAACTCACTCTTAGGCTC |
